# Supplementary material for: Adeno-associated virus capsid antigen presentation is dependent on endosomal escape
Source: JCI journal article supplement (doi:10.1172/jci66611), 2013-02-01
Supplement: sd1 [file 1]

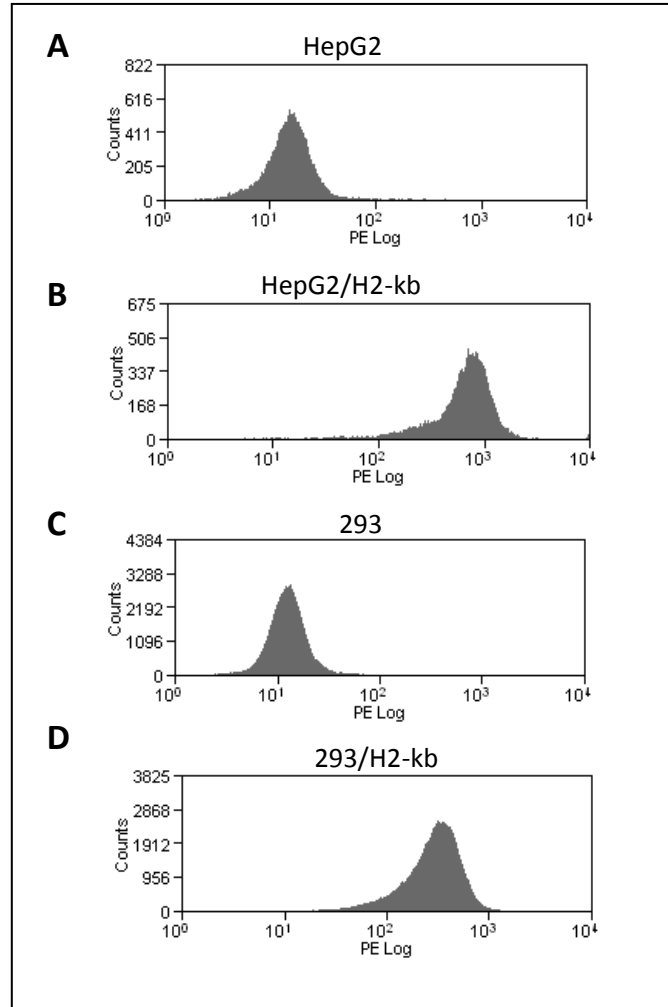

**Supplementary Figure 1. H2-kb expression in HepG2/H2-kb and 293/H2-kb cells.** HepG2 and 293 cells were infected by lentivirus vector lenti/H2-kb overnight. Blasticidin S was added into the culture medium at 10 $\mu$ g/ml for selection, and cells were split every 3-4 days with fresh medium and blasticidin S. The cell lines were established by serial dilution to a single cell in the presence of blasticidin S. Cell lines and parent cells were incubated with medium containing mouse anti-H2-kb antibody from TIB139 culture. After washing, secondary antibody PE-conjugated rat anti-mouse Ig was added. Expression of H2-kb was detected by flow cytometry. **A:** HepG2 cells, **B:** HepG2/H2-kb cells, **C:** 293 cells, **D:** 293/H2-kb cells.

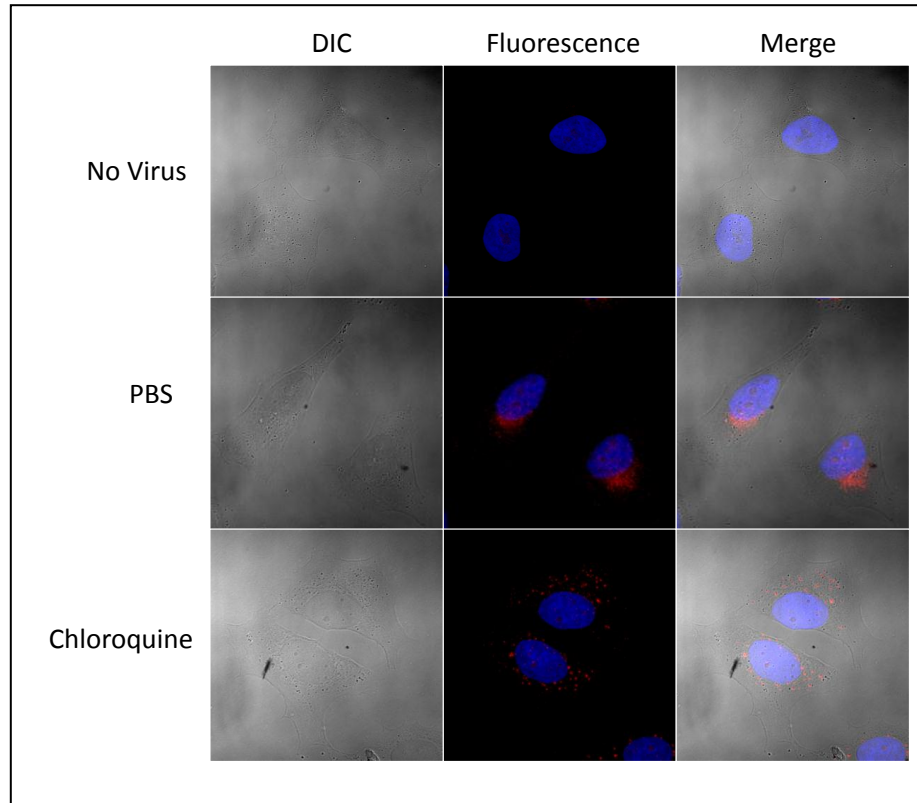

**Supplementary Figure 2. The effect of acidification inhibitors on AAV2 entry.** AAV2 was labeled with Cy5 dye (Xiao, PJ et al. Molecular Therapy 2012, 20(2): 317-28). HeLa cells ( $5 \times 10^4$  cells/well) were plated on poly-L-lysine coated 12 mm glass coverslips 18 h before infection. 2h prior to infection, cells were either treated with Chloroquine (100  $\mu$ M) or vehicle (PBS), which remained present for the duration of infection. Pulse-infection with Cy5-labeled AAV2/CMV-GFP was performed as follows:  $1 \times 10^5$  vg/cell were added to cells for 60 min at 4°C. Unbound virus was removed by washing cells three times with PBS. Pre-warmed media either containing Chloroquine or PBS was then added and cells were incubated at 37 °C (0h post infection). Four hours post-infection, cells were washed three times with PBS and fixed with 2% paraformaldehyde for 15 min at room temperature. Following three washes with PBS, cells were permeabilized with 0.1% Triton X-100 in PBS for 5 min at room temperature. Cells were then washed three times with PBS and coverslips were affixed to slides with a mounting medium (Prolong Antifade Gold with DAPI; Molecular Probes). Images were captured on a Zeiss LSM710 laser scanning confocal microscope using a Zeiss Plan-Apochromat 63X/NA 1.40 oil objective. Images were deconvolved using AutoQuant X3 software (MediaCybernetics) and processed using IMARIS software (Bitplane).

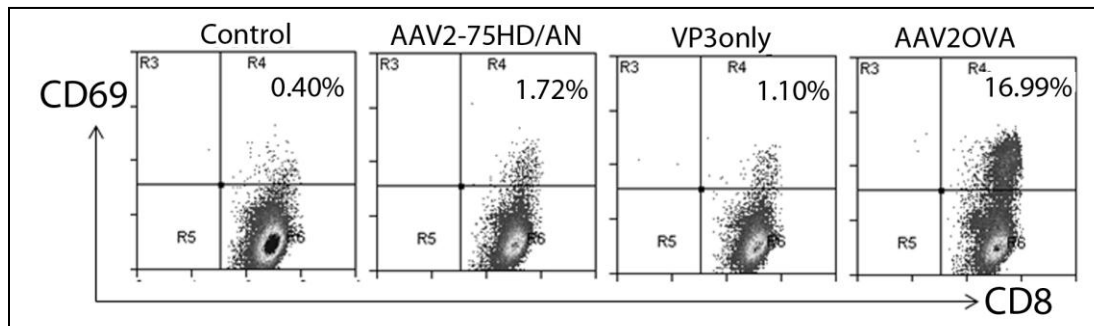

**Supplementary Figure 3. Mutation of PLA and VP3 only virion reduced AAV capsid antigen presentation.** Representative data were from one experiment.

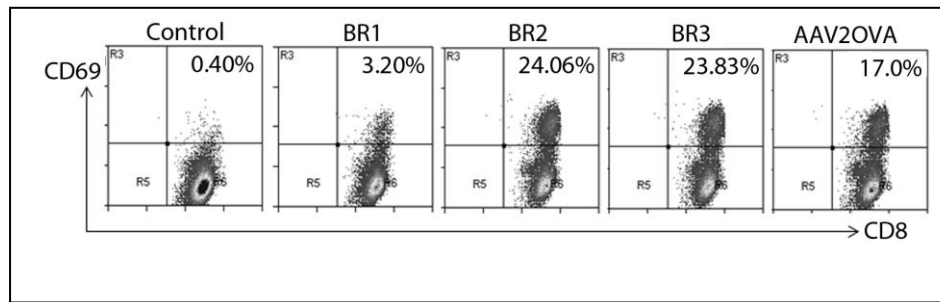

**Supplementary Figure 4. The effect of AAV NLSs on capsid antigen presentation.** Representative data were from one experiment.

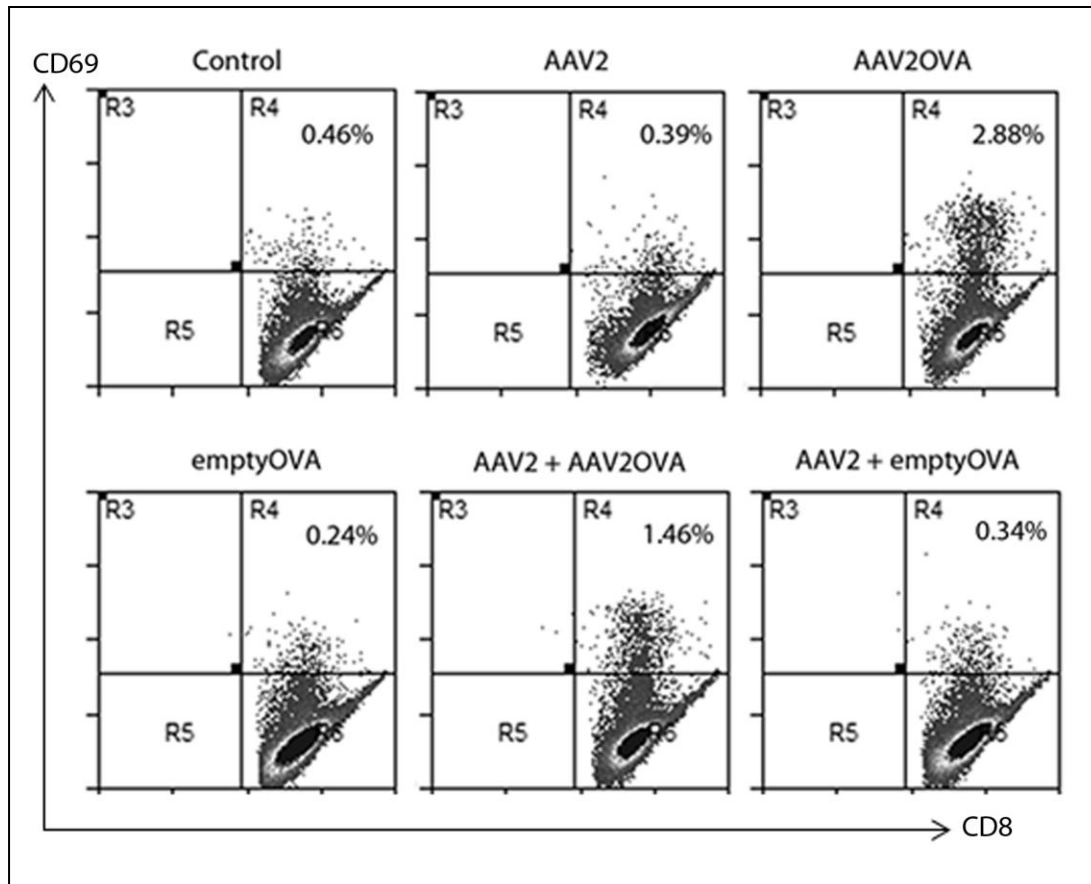

**Supplementary Figure 5** The effect of AAV full particles on antigen presentation from empty capsids. Representative data were from one experiment.

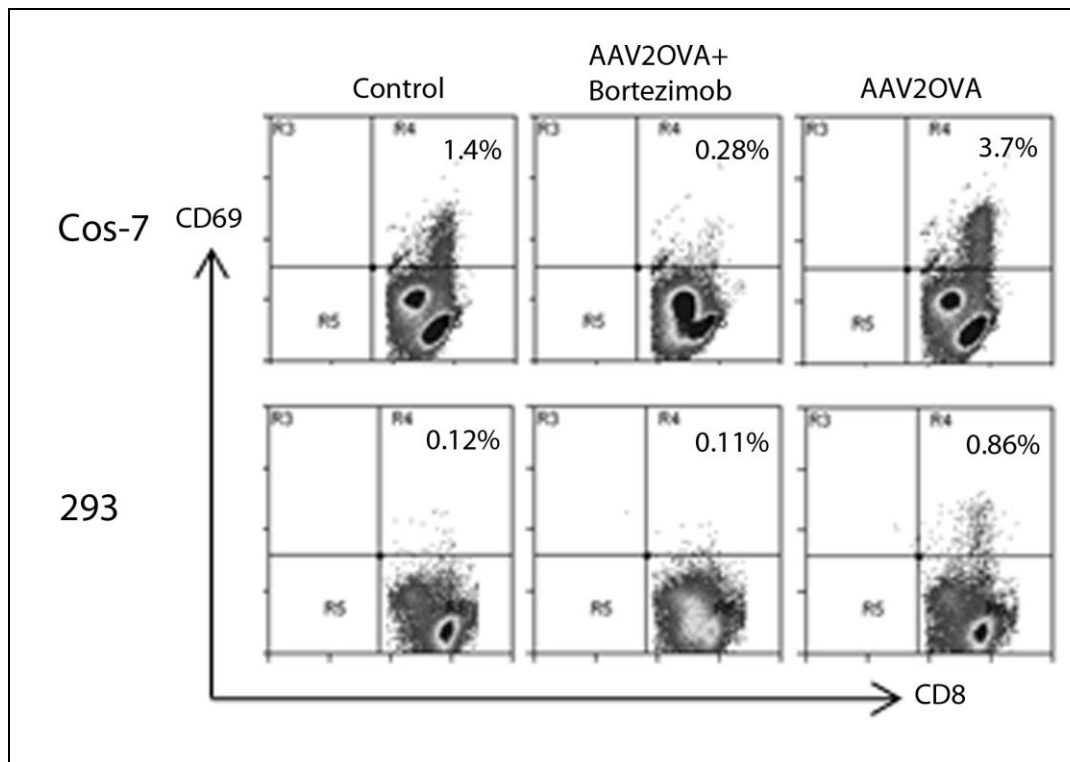

**Supplementary Figure 6. The effect of proteasome inhibitor on antigen presentation from AAV2 capsids in Cos-7 and 293 cells.** Representative data were from one experiment.
